# Supplementary material
Source: Springer Nature journal article supplement (https://www.springermedizin.de/resource/supplementary/12875_2013_928_MOESM4_ESM.pdf/9435420)

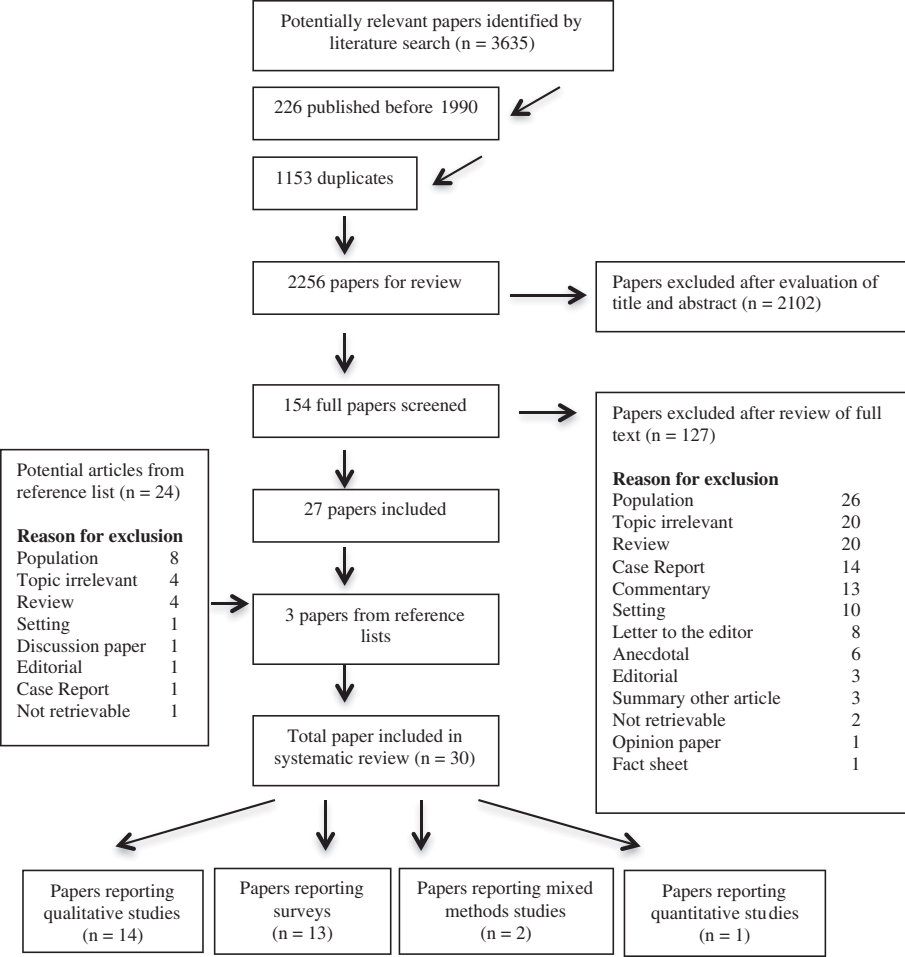

Supplement: MOESM4 [file 9435420]
